# Supplementary figures and images for: Inflammation Mediates Exercise Effects on Fatigue in Patients with Breast Cancer
Source: PubMed Central journal article supplement — Med Sci Sports Exerc. 2020 Oct 2;53(3):496–504. doi: 10.1249/MSS.0000000000002490 (PMC7886356; doi:10.1249/mss.0000000000002490), 2020-10-02

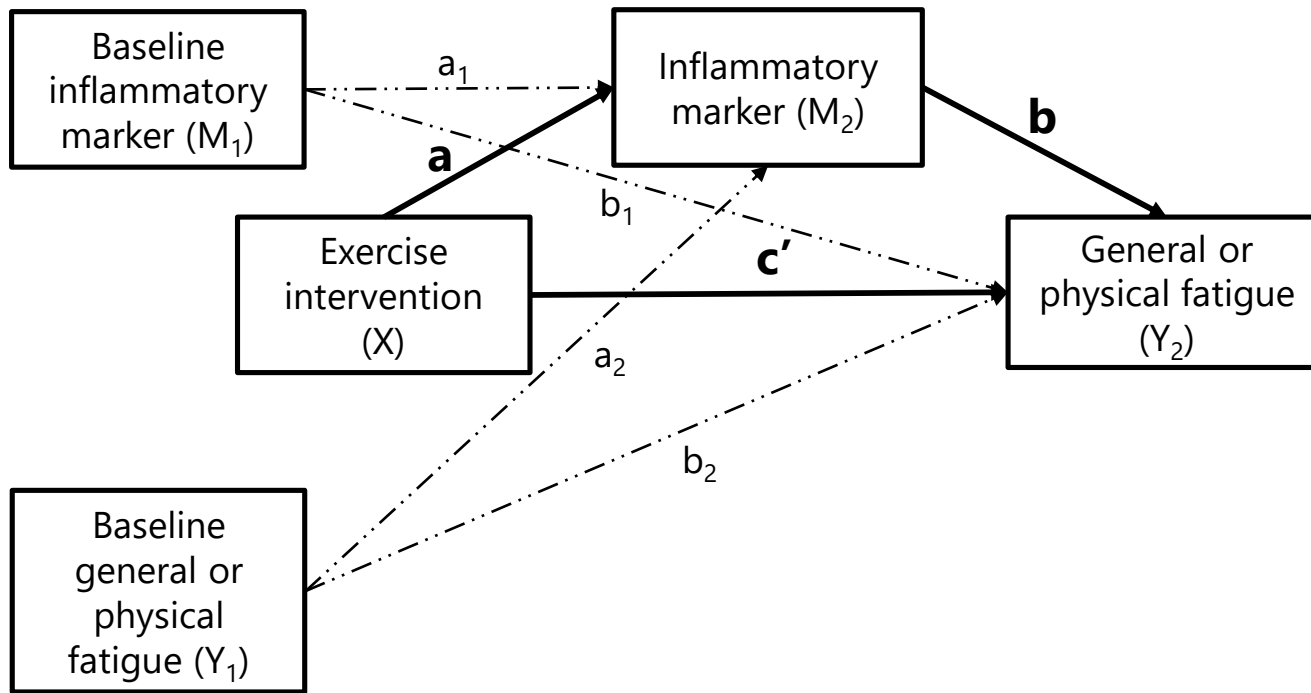

**Supplemental Digital Content 1.** Schematic representation of the mediation model.

Supplement: mss-53-496-s001.pdf [file mss-53-496-s001.pdf]
